# Supplementary material
Source: PubMed Central journal article supplement (PMC6045914)
Supplement: NIHMS980013-supplement-Supplemental_Information.pdf [file NIHMS980013-supplement-Supplemental_Information.pdf]

# JOURNAL *of* HEALTH *and* SOCIAL BEHAVIOR

OFFICIAL JOURNAL OF THE AMERICAN SOCIOLOGICAL ASSOCIATION

**ONLINE SUPPLEMENT**

**to article in**

Journal of Health and Social Behavior, 2015, Vol. 56, Issue 4

**First-birth Timing, Marital History, and Women's Health at Midlife**

**Kristi Williams**

*The Ohio State University*

**Sharon Sassler**

*Cornell University*

**Fenaba Addo**

*University of Wisconsin-Madison*

**Adrienne Frech**

*University of Akron*

**Table A1: Self-assessed Health at Age 40 Regressed on Age at First Birth, Covariates, and Interactions with Race-ethnicity: U.S Women Who Had a First Birth Between the Ages of 15 and 35.**

|                                                       | Self-Assessed Health at Age 40 |                  |                              |                  |
|-------------------------------------------------------|--------------------------------|------------------|------------------------------|------------------|
|                                                       | Single Interaction             |                  | Saturated Model <sup>a</sup> |                  |
|                                                       | (1)                            | (2)              | (3)                          | (4)              |
| <i>Age at 1<sup>st</sup> birth (ref = 25-35)</i>      |                                |                  |                              |                  |
| Age 15-19                                             | -.18***<br>(.05)               | -.20**<br>(.07)  | -.16***<br>(.05)             | -.10<br>(.07)    |
| Black*15-19                                           | ---                            | -.01<br>(.11)    | ---                          | -.16<br>(.11)    |
| Hispanic*15-19                                        | ---                            | .09<br>(.12)     | ---                          | -.06<br>(.12)    |
| Age 20-24                                             | -.19***<br>(.04)               | -.19**<br>(.06)  | -.18***<br>(.04)             | -.15**<br>(.06)  |
| Black*20-24                                           | ---                            | -.01<br>(.11)    | ---                          | -.08<br>(.11)    |
| Hispanic*20-24                                        | ---                            | .03<br>(.11)     | ---                          | -.04<br>(.12)    |
| <i>Race-ethnicity (ref = white)</i>                   |                                |                  |                              |                  |
| Black                                                 | -.08<br>(.05)                  | -.07<br>(.08)    | .41+<br>(.23)                | .54*<br>(.25)    |
| Hispanic                                              | -.11+<br>(.06)                 | -.15+<br>(.09)   | .38+<br>(.21)                | .44+<br>(.23)    |
| Unmarried at 1 <sup>st</sup> birth (ref = married)    | -.24***<br>(.05)               | -.24***<br>(.05) | -.36***<br>(.08)             | -.38***<br>(.08) |
| R's mother's education                                | .03***<br>(.01)                | .03***<br>(.01)  | .05***<br>(.01)              | .05***<br>(.01)  |
| R's mother had adolescent birth                       | .05<br>(.07)                   | .05<br>(.07)     | .06<br>(.07)                 | .06<br>(.07)     |
| R used contraception before 1 <sup>st</sup> pregnancy | .02<br>(.04)                   | .02<br>(.04)     | .01<br>(.04)                 | .01<br>(.04)     |
| <i>Home environment at age 14<sup>b</sup></i>         |                                |                  |                              |                  |
| Lived with both parents                               | -.04<br>(.05)                  | -.03<br>(.05)    | .06<br>(.06)                 | .06<br>(.06)     |
| Urban                                                 | -.05<br>(.04)                  | -.05<br>(.04)    | -.05<br>(.04)                | -.05<br>(.04)    |
| South                                                 | .07<br>(.04)                   | .07<br>(.04)     | .07<br>(.04)                 | .07<br>(.04)     |
| Reading material in home                              | .02                            | .02              | .23+                         | .24+             |

|                                                               |         |         |         |         |
|---------------------------------------------------------------|---------|---------|---------|---------|
|                                                               | (.06)   | (.06)   | (.13)   | (.13)   |
| Adult female in home employed                                 | .03     | .03     | .04     | .04     |
|                                                               | (.04)   | (.04)   | (.04)   | (.04)   |
| Adult male in home employed                                   | .07     | .07     | .10+    | .10+    |
|                                                               | (.05)   | (.05)   | (.05)   | (.05)   |
| <i>Religion in childhood (ref = Baptist)</i>                  |         |         |         |         |
| Catholic                                                      | .09     | .08     | .07     | .08     |
|                                                               | (.06)   | (.06)   | (.06)   | (.06)   |
| Liberal Protestant                                            | .03     | .02     | .02     | .02     |
|                                                               | (.06)   | (.06)   | (.06)   | (.06)   |
| Other religion                                                | -.05    | -.05    | -.04    | -.04    |
|                                                               | (.07)   | (.07)   | (.07)   | (.07)   |
| No religion                                                   | .07     | .07     | .07     | .07     |
|                                                               | (.09)   | (.09)   | (.09)   | (.09)   |
| Health limitation prior to 1 <sup>st</sup> birth (ref = none) | -.39*** | -.39*** | -.40*** | -.40*** |
|                                                               | (.07)   | (.07)   | (.07)   | (.07)   |
| <i>Interactions with covariates</i>                           |         |         |         |         |
| R's mother's education*black                                  | ---     | ---     | -.01    | -.02    |
|                                                               |         |         | (.02)   | (.02)   |
| R's mother's education*Hispanic                               | ---     | ---     | -.03    | -.03+   |
|                                                               |         |         | (.02)   | (.02)   |
| Reading material in home*black                                | ---     | ---     | -.28+   | -.29+   |
|                                                               |         |         | (.15)   | (.15)   |
| Reading material in home*Hispanic                             | ---     | ---     | -.22    | -.22    |
|                                                               |         |         | (.16)   | (.16)   |
| Lived with both parents*black                                 | ---     | ---     | -.23**  | -.24**  |
|                                                               |         |         | (.09)   | (.09)   |
| Lived with both parents*Hispanic                              | ---     | ---     | -.12    | -.12    |
|                                                               |         |         | (.10)   | (.10)   |
| Unmarried at 1 <sup>st</sup> birth*black                      | ---     | ---     | .15     | .19+    |
|                                                               |         |         | (.10)   | (.11)   |
| Unmarried at 1 <sup>st</sup> birth*Hispanic                   | ---     | ---     | .25*    | .27*    |
|                                                               |         |         | (.11)   | (.12)   |
| Constant                                                      | 3.34*** | 3.35*** | 2.92*** | 2.86*** |
|                                                               | (.11)   | (.12)   | (.18)   | (.18)   |
| Observations                                                  | 3,348   | 3,348   | 3,348   | 3,348   |

*Note:* Standard errors in parentheses; <sup>a</sup> Saturated model includes all significant interactions of race-ethnicity with covariates; <sup>b</sup> 6 dichotomous measures of home environment at age 14 coded so that 0 = absence of the characteristic.  
+p<.1, \*p<.05, \*\* p<.01, \*\*\* p<.001.
